# Supplementary material for: Technical note: What does the Standardized Streamflow Index actually reflect? Insights and implications for hydrological drought analysis
Source: Copernicus journal article supplement (doi:10.5194/hess-2024-221), 2024-09-03
Supplement: Supplementary file 1 [file hess-2024-221-supplement.pdf]

Supplement of

**Technical note: What does the Standardized Streamflow Index actually reflect? Insights and implications for hydrological drought analysis**

Lema et al.

**Table S1. Description of the SUMMA model parameters and ranges used for calibration.**

| Parameter            | Description                                                           | Units                           | Calibration range |                   |
|----------------------|-----------------------------------------------------------------------|---------------------------------|-------------------|-------------------|
|                      |                                                                       |                                 | Min               | Max               |
| Ksoil                | Hydraulic conductivity of soil                                        | m/s                             | 10 <sup>-7</sup>  | 10 <sup>-4</sup>  |
| θsat                 | Porosity                                                              | -                               | 0.30              | 0.60              |
| CritSoilTranspire    | Critical Volume of liquid water content when transpiration is limited | -                               | 0.00              | 1.00              |
| vGnn                 | Van Genuchten "n" parameter                                           | -                               | 1.00              | 2.00              |
| vGnα                 | Van Genuchten "alpha" parameter                                       | 1/m                             | -1.00             | -0.01             |
| aquiferBaseflowExp   | Baseflow exponent                                                     | -                               | 1.00              | 10.00             |
| aquiferBaseflowRate  | Baseflow rate when aquifer storage is equal to Aquifer Scale Factor   | m/s                             | 10 <sup>-9</sup>  | 0.10              |
| summerLAI            | Maximum leaf area index at the peak of the growing season             | m <sup>2</sup> / m <sup>2</sup> | 0.01              | 10.00             |
| qSurfScale           | Scaling factor in the surface runoff parameterization                 | -                               | 1.00              | 100.00            |
| heighCanopyBottom    | Height of bottom of the vegetation canopy above ground surface        | m                               | 0.00              | 5.00              |
| heighCanopyTop       | Height of top of the vegetation canopy above ground surface           | m                               | 0.05              | 100.00            |
| windReductionParam   | Canopy wind reduction parameter                                       | -                               | 0.00              | 1.00              |
| routingGammaScale    | Scale parameter in Gamma distribution used for sub-grid routing       | s                               | 360               | 86400             |
| routingGammaShape    | Shape parameter in Gamma distribution used for sub-grid routing       | -                               | 1.00              | 5.00              |
| Fcapil               | Capillary retention as a fraction of the total pore volume            | -                               | 0.01              | 0.10              |
| αdecayRate           | Albedo decay rate                                                     | s                               | 10 <sup>6</sup>   | 5•10 <sup>6</sup> |
| αmax                 | Maximum snow albedo for a single spectral band                        | -                               | 0.70              | 0.95              |
| Kmacropore           | Saturated hydraulic conductivity for macropores                       | m/s                             | 10 <sup>-7</sup>  | 10 <sup>-1</sup>  |
| Ksnow                | Hydraulic conductivity of snow                                        | m/s                             | 0.005             | 0.05              |
| tempCritRain         | Critical temperature where precipitation is rain                      | K                               | 272.16            | 274.16            |
| refInterceptCapSnow  | Reference canopy interception capacity per unit leaf area (snow)      | kg/m <sup>2</sup>               | 1.00              | 10.00             |
| refInterceptCapRain  | Canopy interception capacity per unit leaf area (rain)                | kg/m <sup>2</sup>               | 0.01              | 1.00              |
| mwexp                | Exponent for meltwater flow                                           | -                               | 1.00              | 5.00              |
| throughfallScaleSnow | Scaling factor for throughfall (snow)                                 | -                               | 0.10              | 0.90              |
| throughfallScaleRain | Scaling factor for throughfall (rain)                                 | -                               | 0.10              | 0.90              |
| wettingFrontSuction  | Green-Ampt wetting front suction                                      | m                               | 0.10              | 1.50              |

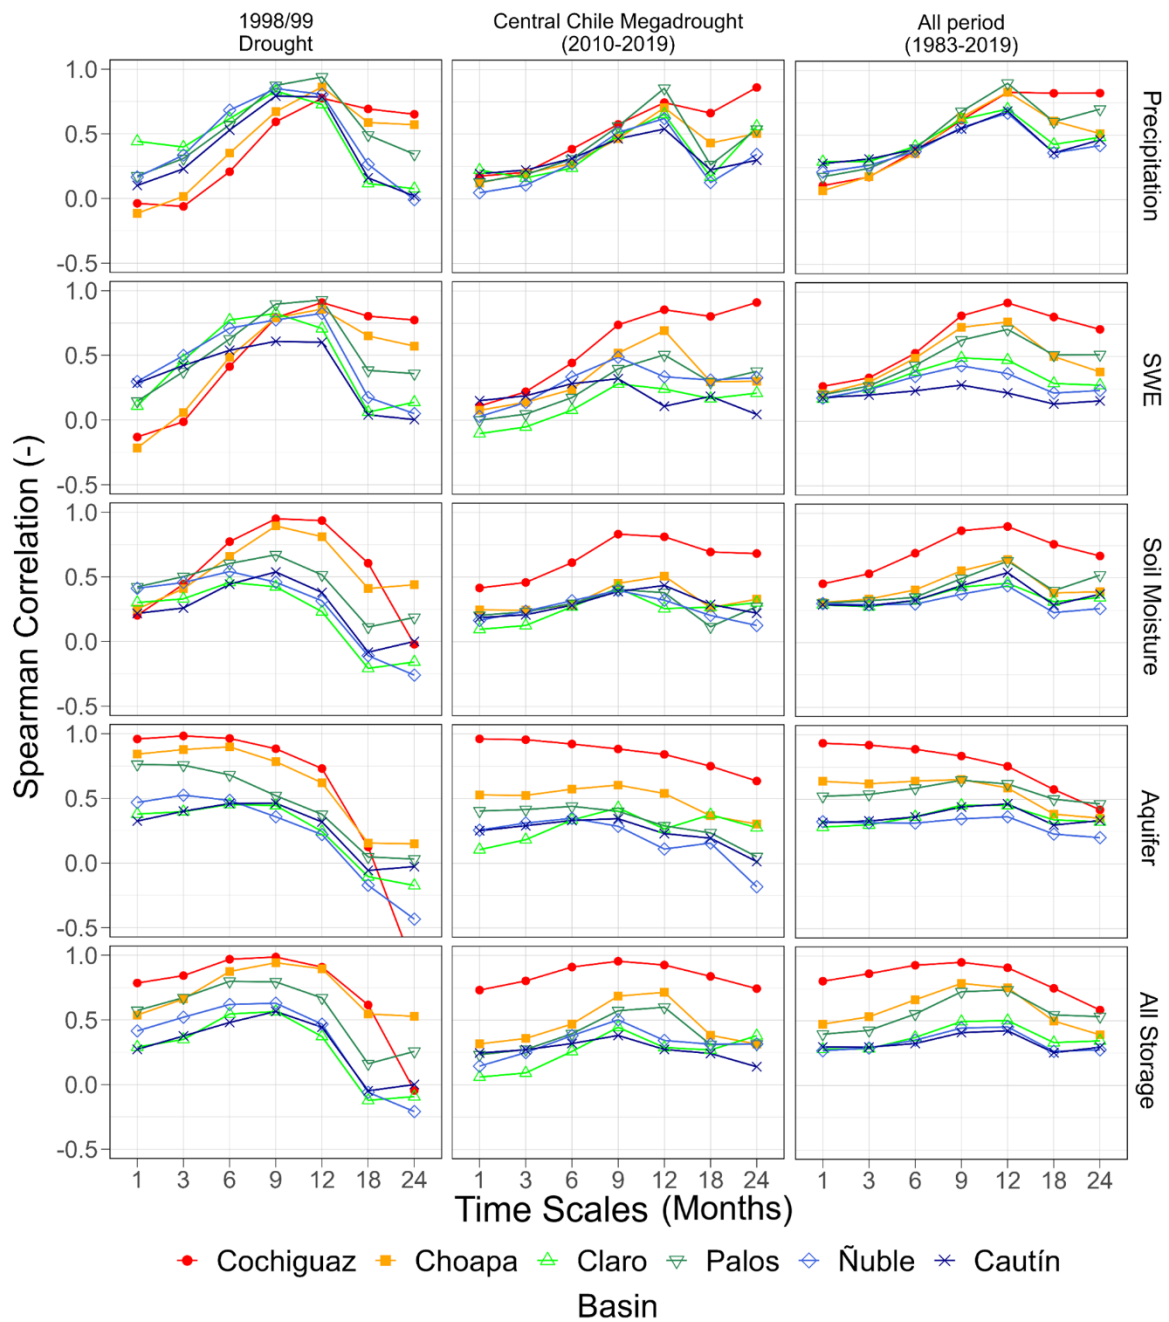

**Figure S1. Spearman rank correlation coefficients between SSI-1 and temporally aggregated/averaged catchment-scale explanatory variables (rows) for three different periods: the October/1998-September/1999 drought event (left), the central Chile megadrought (April/2010-March/2019, center), and the entire analysis period (April/1983 - March/2020, right).**

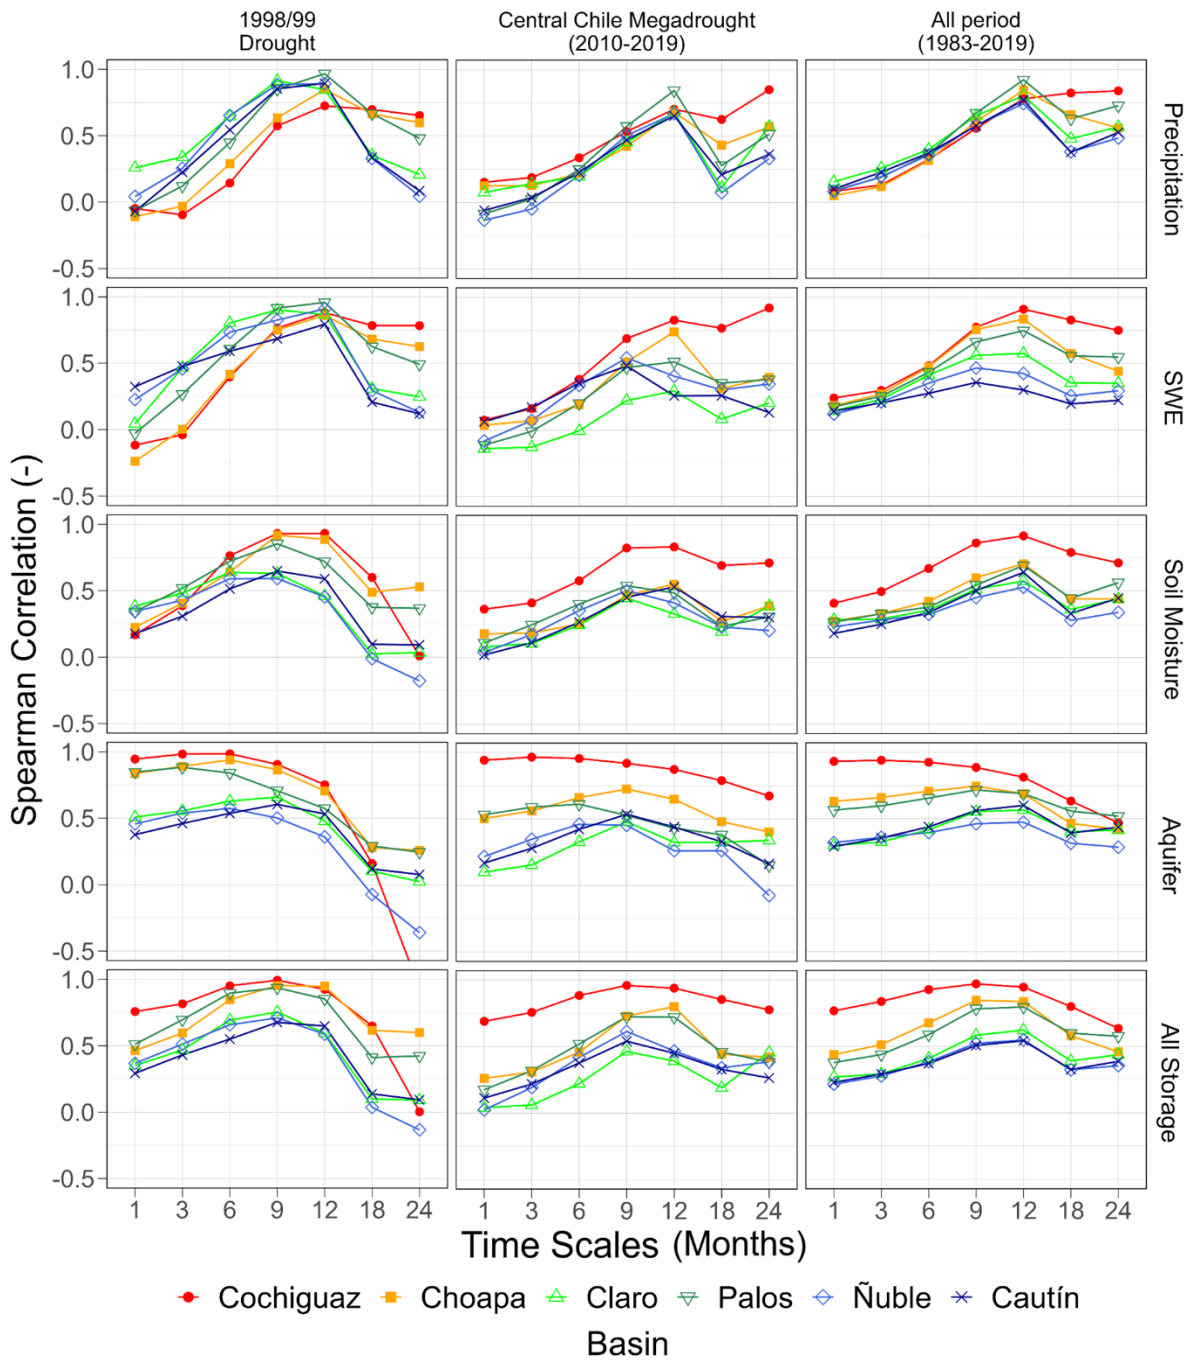

**Figure S2.** Spearman rank correlation coefficients between SSI-3 and temporally aggregated/averaged catchment-scale explanatory variables (rows) for three different periods: the October/1998-September/1999 drought event (left), the central Chile megadrought (April/2010-March/2019, center), and the entire analysis period (April/1983 - March/2020, right).

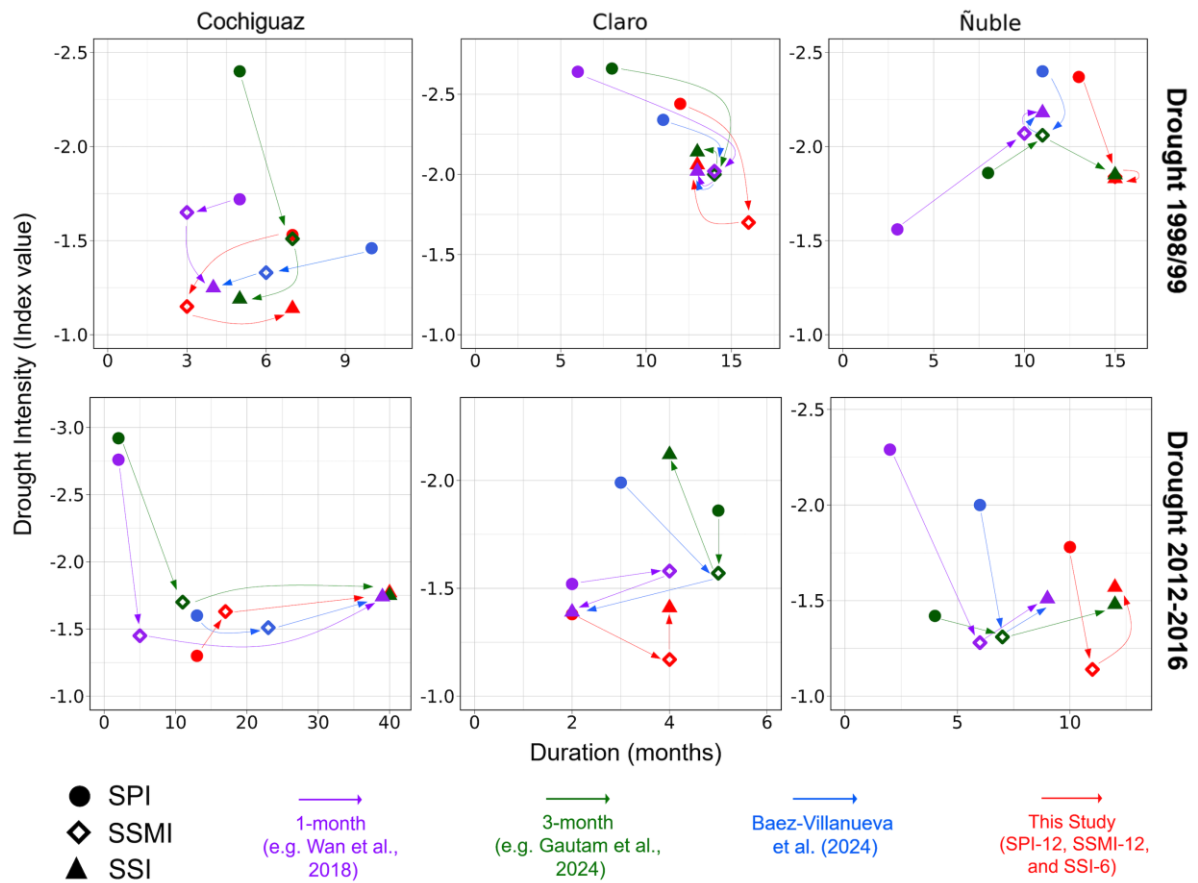

**Figure S3.** Propagation from meteorological (circles) to agricultural (diamonds) and hydrological (triangles) droughts for two selected events (1998/99 and 2016/17, displayed in different rows) and three basins with different hydrological regimes: (a) Cochiguaz (snowmelt-driven, left), (b) Claro (rainfall-driven, center) and Ñuble (mixed regime, right). The x-axis shows the duration in months, and the y-axis displays the intensity. The colors indicate trajectories obtained with time scales recommended by different studies (see main manuscript for details).

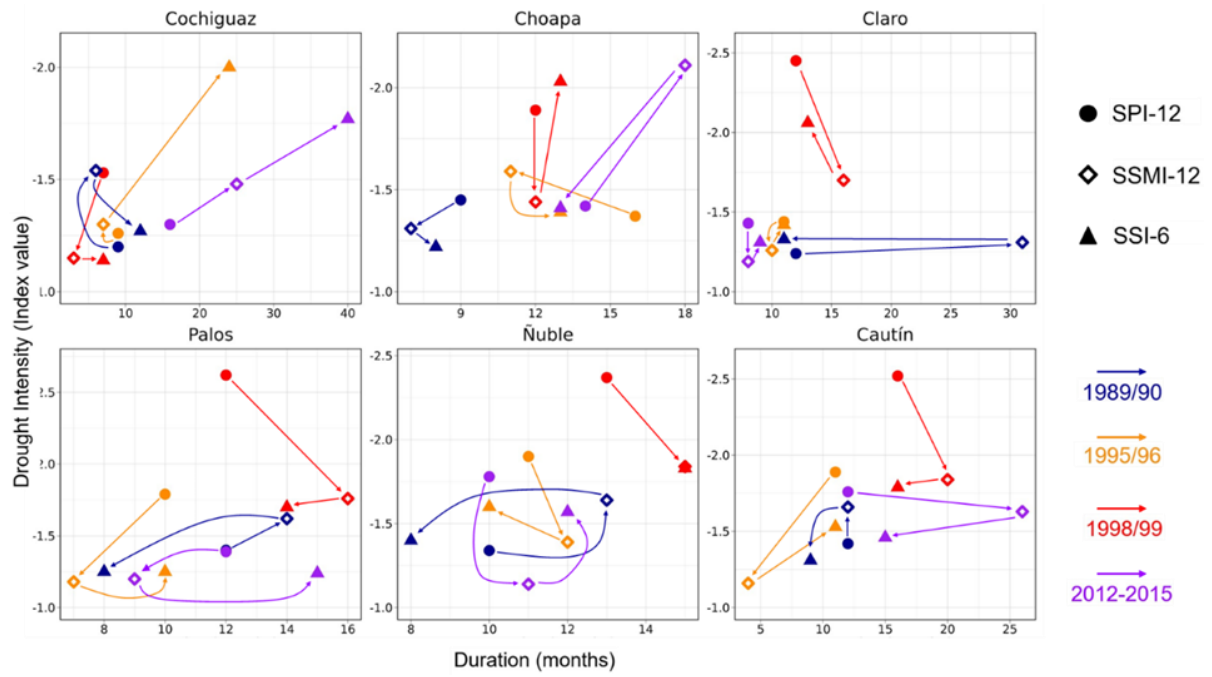

**Figure S4. Propagation from meteorological (circles) to agricultural (diamonds) and hydrological (triangles) droughts for four selected events (1989/1990, 1995/96, 1998/99 and 2012/15, shown with different colors) and three case study basins. The x-axis shows the duration in months, and the y-axis displays the intensity. The time scales used to compute the standardized indices were selected based on exploratory correlation analysis (see main manuscript for details).**
